# Supplementary material
Source: publisher figshare collection journal article supplement (https://tandf.figshare.com/ndownloader/files/15302549)
Supplement: Supplementary file 1 [file 15302549]

**Supplementary material for Tran et al., “Primary Congenital Glaucoma in Vietnam: Analysis and identification of novel CYP1B1 variants”, *Ophthalmic Genetics*, 2019.**

| Patient No. | Nucleotide change | Amino acid change     | Mutation type | Heterozygous/Homozygous |
|-------------|-------------------|-----------------------|---------------|-------------------------|
| G02         |                   | Whole CYP1B1 deletion |               | Homozygous              |
| G56         |                   | Whole CYP1B1 deletion |               | Homozygous              |
| G10         | c.475C>T          | Q159X                 | Nonsense      | Heterozygous            |
|             | c.652G>C          | D218H                 | Missense      | Heterozygous            |
| G09         | c.475C>T          | Q159X                 | Nonsense      | Heterozygous            |
|             | c.490C>T          | Q164X                 | Nonsense      | Heterozygous            |
|             | c.652G>C          | D218H                 | Missense      | Heterozygous            |
| G11         | c.256C>A          | Q86K                  | Missense      | Heterozygous            |
|             | c.475C>T          | Q159X                 | Nonsense      | Heterozygous            |
| G15         | c.571DelC         | L191Sfs*4             | Frameshift    | Homozygous              |
| G20         | c.80T>A           | L27Q                  | Missense      | Heterozygous            |
|             | c.182G>A          | G61E                  | Missense      | Heterozygous            |
| G21         | c.256C>A          | Q86K                  | Missense      | Heterozygous            |
|             | c.592G>A          | V198I                 | Missense      | Heterozygous            |
| G24         | c.685G>A          | E229K                 | Missense      | Heterozygous            |
|             | c.724G>A          | D242N                 | Missense      | Homozygous              |
| G40         | c.652G>C          | D218H                 | Missense      | Heterozygous            |
|             | c.685G>A          | E229K                 | Missense      | Heterozygous            |
| G08         | c.256C>A          | Q86K                  | Missense      | Heterozygous            |
| G19         | c.397G>A          | A133T                 | Missense      | Heterozygous            |
| G43         | c.256C>A          | Q86K                  | Missense      | Heterozygous            |
| G44         | c.1094G>A         | G365E                 | Missense      | Heterozygous            |

Ten patients (11.76%) were found to have two likely pathogenic mutations causative of PCG (G02, G56, G10, G09, G11, G15, G20, G21, G24, G40) while the other four (G08, G19, G43, G44) have only one mutation in heterozygous state.

Patient G09 has three different most likely disease-causing variants Q159X, Q164X, D218H, in which parental testing need to be carried out to determine the cis/trans state of these mutations.

Patient G24 carries the variant p.D242N in homozygous and the p.E229K change in heterozygous state. However, E229K mutation were reported to be likely benign, that would leave D242N to be likely causative of PCG in this patient.
